# Supplementary material for: Vitamin D Levels and SARS-CoV-2 Infection among Medically Underserved Populations in the Minority and Rural Coronavirus Insights Study
Source: MDPI journal article supplement (doi:10.3390/v16040639), 2024-04-19
Supplement: s1 [file s1]

# Vitamin D Levels and SARS-CoV-2 Infection among Medically Underserved Populations in the Minority and Rural Coronavirus Insights Study

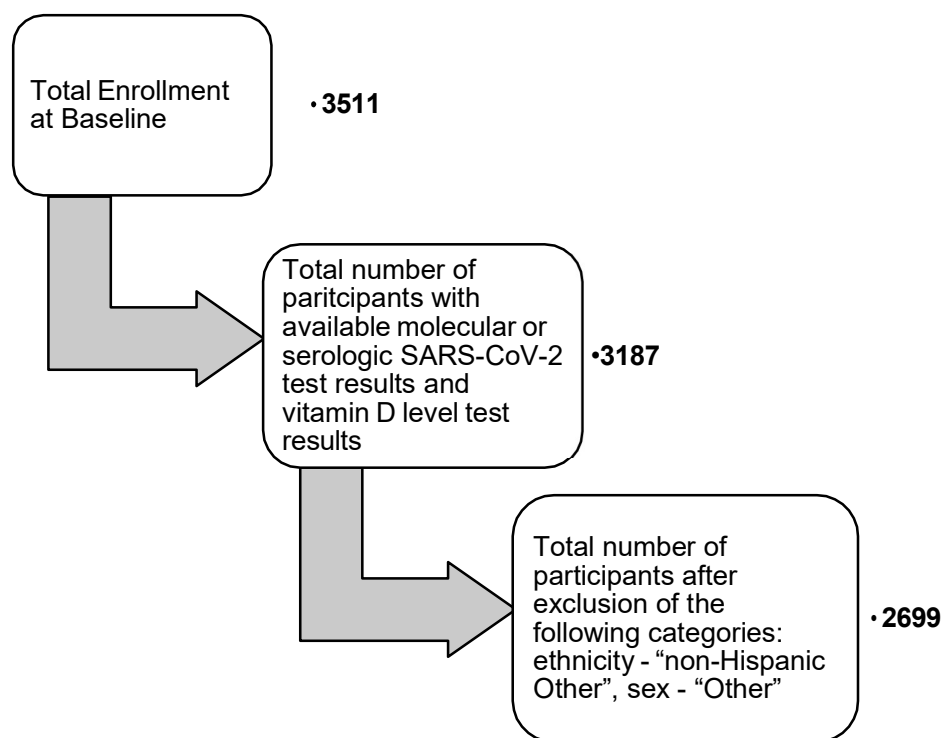

**Figure S1.** MRCIS Cohort Participant Flow.

**Table S1.** Associations between demographic factors, vitamin D Status and the combined molecular and serologic assessment of SARS-CoV-2 status ( $n = 2699$ ).

| Variables             |                     | Adjusted Odds Ratio | 95 % Confidence Interval |
|-----------------------|---------------------|---------------------|--------------------------|
| Age<br>Race/Ethnicity |                     | 0.99                | 0.98–0.99                |
|                       | Hispanic or Latino  | 2.03                | 1.57–2.62                |
|                       | Black, non-Hispanic | 1.92                | 1.44–2.54                |
|                       | White, non-Hispanic | Reference           | Reference                |
| Vitamin D Status ^    | Optimal             | 0.82                | 0.64–1.07                |
|                       | Insufficient        | 0.86                | 0.71–1.04                |
|                       | Deficient           | Reference           | Reference                |

^ Vitamin D status—deficient— $<20$  ng/mL, insufficient— $\geq 20$  and  $<30$  ng/mL, and optimal— $\geq 30$  ng/mL.
